# Supplementary material
Source: Springer Nature journal article supplement (https://www.springermedizin.de/resource/supplementary/12891_2006_228_MOESM1_ESM.pdf/9510788)

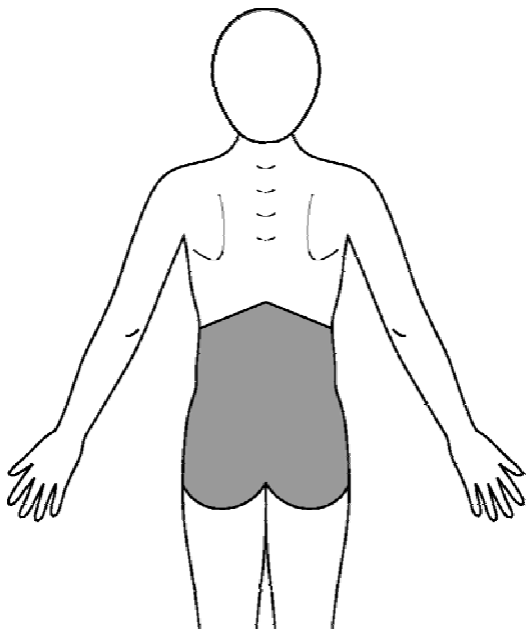

Supplement: MOESM1 [file 9510788]
